# Supplementary material for: Effects of substrate and water depth of a eutrophic pond on the physiological status of a submerged plant, Vallisneria natans
Source: PeerJ. 2020 Nov 9;8:e10273. doi: 10.7717/peerj.10273 (PMC7659635; doi:10.7717/peerj.10273)
Supplement: Supplemental Information 3 [file peerj-08-10273-s003.xlsx]

## Sheet: Sheet1
date	Daily mean temperature	Daily rainfall(mm)			station number	station name	district	longitude	latitude
2019-05-01	19.8	7.7			58659	Wenzhou	Zhejiang	120.7	28
2019-05-02	20.1	0
2019-05-03	19.4	0
2019-05-04	19.1	0
2019-05-05	20.1	0
2019-05-06	20	1.9
2019-05-07	18.2	0.2
2019-05-08	17.7	0
2019-05-09	20.6	0
2019-05-10	21	0
2019-05-11	20.8	0
2019-05-12	21.6	0
2019-05-13	19	7.7
2019-05-14	19.9	0.5
2019-05-15	21.2	11.8
2019-05-16	23.4	10
2019-05-17	24.2	1.5
2019-05-18	24.8	0
2019-05-19	24.4	0
2019-05-20	22.4	40.4
2019-05-21	21.9	0
2019-05-22	20.3	0
2019-05-23	22.6	0
2019-05-24	22.9	0
2019-05-25	23	0
2019-05-26	24.2	1.8
2019-05-27	26	0.1
2019-05-28	19	10.8
2019-05-29	20.4	0
2019-05-30	21.8	0
2019-05-31	21.1	21.1
2019-06-01	19.9	42.2
2019-06-02	21.2	8.3
2019-06-03	22.5	3.7
2019-06-04	25.8	0
2019-06-05	26.1	0
2019-06-06	28.4	0
2019-06-07	24.1	20.2
2019-06-08	23.2	1.8
2019-06-09	24.5	26.2
2019-06-10	25.4	0
2019-06-11	24.4	0.1
2019-06-12	22.3	0
2019-06-13	20.1	61.9
2019-06-14	21.9	0
2019-06-15	23.8	0
2019-06-16	24.7	0
2019-06-17	23.2	0
2019-06-18	26	1.9
2019-06-19	26.4	23.2
2019-06-20	24.9	3.7
2019-06-21	25.4	6.8
2019-06-22	23.1	21.9
2019-06-23	22.8	4.6
2019-06-24	24.1	0.2
2019-06-25	22	100.9
2019-06-26	24.9	17.6
2019-06-27	27.2	1.1
2019-06-28	28.8	0
2019-06-29	29.6	0
2019-06-30	28.3	5.3
2019-07-01	28.8	0
2019-07-02	28.2	0.8
2019-07-03	27.1	46.2
2019-07-04	26.3	32.8
2019-07-05	26.3	25.6
2019-07-06	26.1	1
2019-07-07	26.4	1.4
2019-07-08	24.4	4.7
2019-07-09	24.1	18
2019-07-10	24.1	18.5
2019-07-11	25.1	1.4
2019-07-12	26.7	5.3
2019-07-13	29.6	0
2019-07-14	25.1	8
2019-07-15	25.1	2.2
2019-07-16	26.6	0
2019-07-17	28.9	0
2019-07-18	28.1	1.1
2019-07-19	30.3	0
2019-07-20	29.9	0.8
2019-07-21	29.4	1.4
2019-07-22	28.9	4.3
2019-07-23	29.1	0
2019-07-24	29.6	0
2019-07-25	31	0
2019-07-26	30.8	0
2019-07-27	29.6	0
2019-07-28	29.6	0
2019-07-29	30.2	0
2019-07-30	30.3	0
2019-07-31	29.7	0
2019-08-01	29.7	11.3
2019-08-02	29.6	0
2019-08-03	26.4	25
2019-08-04	28.4	0.5
2019-08-05	29.2	0.7
2019-08-06	29.4	0
2019-08-07	30	0
2019-08-08	29.3	3.8
2019-08-09	26.5	83.2
2019-08-10	27.9	16.5
2019-08-11	30.9	0
2019-08-12	30.7	0
2019-08-13	29.1	8.9
2019-08-14	29.3	0
2019-08-15	29.1	5.6
2019-08-16	28.9	0
2019-08-17	29.3	0
2019-08-18	30	1
2019-08-19	28.5	0
2019-08-20	28.5	0
2019-08-21	29.4	0
2019-08-22	28.5	3.7
2019-08-23	30	0.1
2019-08-24	29.4	0.1
2019-08-25	28.8	14.7
2019-08-26	29.6	0.4
2019-08-27	30.4	0
2019-08-28	30	0
2019-08-29	28.4	2.1
2019-08-30	26	0
2019-08-31	25.6	0
