# Supplementary material for: Effects of substrate and water depth of a eutrophic pond on the physiological status of a submerged plant, Vallisneria natans
Source: PeerJ. 2020 Nov 9;8:e10273. doi: 10.7717/peerj.10273 (PMC7659635; doi:10.7717/peerj.10273)
Supplement: Supplemental Information 4 [file peerj-08-10273-s004.xlsx]

## Sheet: Chl
day	substrate	beaker id	chla	chlb
0d	mud		0.276125	0.113171
0d	mud		0.373528	0.202486
4d	sand		0.370196	0.13388
4d	mud		0.389312	0.139488
10d	sand	1	0.347503	0.12614
10d	sand	2	0.343463	0.133379
10d	sand	3	0.343401	0.123051
10d	mud	4	0.423966	0.148572
10d	mud	5	0.383836	0.142656
10d	mud	6	0.432618	0.167238
20d	sand	1	0.422554	0.160594
20d	sand	2	0.423888	0.160103
20d	sand	3	0.404874	0.159058
20d	mud	4	0.401014	0.15933
20d	mud	5	0.352092	0.135951
20d	mud	6	0.427951	0.168958
30d	sand	1	0.19773	0.0870145
30d	sand	2	0.282116	0.118029
30d	sand	3	0.293999	0.130903
30d	mud	4	0.394347	0.161787
30d	mud	5	0.364422	0.161313
30d	mud	6	0.316448	0.135283
40d	sand	1	0.277527	0.108218
40d	sand	2	0.310244	0.128368
40d	sand	3	0.25736	0.100697
40d	mud	4	0.404552	0.167228
40d	mud	5	0.324778	0.162119
40d	mud	6	0.398975	0.165833
50d	sand	1	0.288744	0.121338
50d	sand	2	0.311154	0.131483
50d	sand	3	0.286422	0.130245
50d	mud	4	0.401399	0.161489
50d	mud	5	0.387719	0.158479
50d	mud	6	0.374078	0.149703

## Sheet: MDA
day	tissue	substrate	beaker id	mda
0d	leaf	mud		3.29795
4d	leaf	sand		4.1373
4d	leaf	mud		4.873
10d	leaf	sand	1	4.08265
10d	leaf	sand	2	3.65635
10d	leaf	sand	3	3.3351
10d	leaf	mud	4	4.7578
10d	leaf	mud	5	4.2748
10d	leaf	mud	6	4.4098
20d	leaf	sand	1	4.26495
20d	leaf	sand	2	3.6804
20d	leaf	sand	3	4.2578
20d	leaf	mud	4	5.6095
20d	leaf	mud	5	4.3868
20d	leaf	mud	6	4.6926
30d	leaf	sand	1	4.57675
30d	leaf	sand	2	3.73555
30d	leaf	sand	3	4.20925
30d	leaf	mud	4	5.28885
30d	leaf	mud	5	5.37855
30d	leaf	mud	6	4.3953
40d	leaf	sand	1	4.2245
40d	leaf	sand	2	2.75685
40d	leaf	sand	3	3.00345
40d	leaf	mud	4	4.3451
40d	leaf	mud	5	3.03695
40d	leaf	mud	6	3.8515
50d	leaf	sand	1	3.9496
50d	leaf	sand	2	3.87805
50d	leaf	sand	3	2.91345
50d	leaf	mud	4	2.66935
50d	leaf	mud	5	2.20675
50d	leaf	mud	6	3.35925
0d	root	mud		1.08336
4d	root	sand		3.07664
4d	root	mud		1.1436
10d	root	sand	1	2.22384
10d	root	sand	2	2.22736
10d	root	sand	3	2.482
10d	root	mud	4	1.48768
10d	root	mud	5	1.9712
10d	root	mud	6	1.70224
20d	root	sand	1	2.36456
20d	root	sand	2	1.86216
20d	root	sand	3	2.62536
20d	root	mud	4	1.33872
20d	root	mud	5	1.9916
20d	root	mud	6	1.60136
30d	root	sand	1	1.71152
30d	root	sand	2	1.756
30d	root	sand	3	1.81488
30d	root	mud	4	1.18376
30d	root	mud	5	1.35896
30d	root	mud	6	1.78104
40d	root	sand	1	1.92056
40d	root	sand	2	2.10688
40d	root	sand	3	2.02792
40d	root	mud	4	0.98448
40d	root	mud	5	0.982
40d	root	mud	6	0.65416
50d	root	sand	1	2.01696
50d	root	sand	2	1.28512
50d	root	sand	3	1.66456
50d	root	mud	4	0.68784
50d	root	mud	5	1.3344
50d	root	mud	6	1.0696

## Sheet: SOD
day	tissue	substrate	beaker id	sod
0d	leaf	mud		23.5824
4d	leaf	sand		23.0235
4d	leaf	mud		22.9118
10d	leaf	sand	1	19.7824
10d	leaf	sand	2	22.5765
10d	leaf	sand	3	29.2824
10d	leaf	mud	4	25.1471
10d	leaf	mud	5	23.6941
10d	leaf	mud	6	25.5941
20d	leaf	sand	1	38.4471
20d	leaf	sand	2	30.1765
20d	leaf	sand	3	32.9706
20d	leaf	mud	4	36.9941
20d	leaf	mud	5	38.8941
20d	leaf	mud	6	35.3176
30d	leaf	sand	1	39.0059
30d	leaf	sand	2	51.7471
30d	leaf	sand	3	48.5059
30d	leaf	mud	4	46.7176
30d	leaf	mud	5	37.5529
30d	leaf	mud	6	44.3706
40d	leaf	sand	1	52.7529
40d	leaf	sand	2	56.2176
40d	leaf	sand	3	43.8118
40d	leaf	mud	4	46.7176
40d	leaf	mud	5	51.8588
40d	leaf	mud	6	52.4176
50d	leaf	sand	1	40.5706
50d	leaf	sand	2	48.3941
50d	leaf	sand	3	49.9588
50d	leaf	mud	4	50.8529
50d	leaf	mud	5	47.7235
50d	leaf	mud	6	38.8941
0d	root	mud		31.7412
4d	root	sand		34.7588
4d	root	mud		36.8824
10d	root	sand	1	38.1118
10d	root	sand	2	38.7824
10d	root	sand	3	37.1059
10d	root	mud	4	35.4294
10d	root	mud	5	36.6588
10d	root	mud	6	24.0294
20d	root	sand	1	27.7176
20d	root	sand	2	26.6
20d	root	sand	3	28.2765
20d	root	mud	4	29.5059
20d	root	mud	5	31.0706
20d	root	mud	6	36.7706
30d	root	sand	1	35.7647
30d	root	sand	2	40.4588
30d	root	sand	3	35.0941
30d	root	mud	4	33.4176
30d	root	mud	5	30.1765
30d	root	mud	6	32.1882
40d	root	sand	1	43.7
40d	root	sand	2	34.8706
40d	root	sand	3	36.2118
40d	root	mud	4	38.8941
40d	root	mud	5	29.1706
40d	root	mud	6	41.6882
50d	root	sand	1	37.3294
50d	root	sand	2	38.8941
50d	root	sand	3	37.6647
50d	root	mud	4	36.6588
50d	root	mud	5	45.7118
50d	root	mud	6	39.0059

## Sheet: CAT
day	tissue	substrate	beaker id	cat
0d	leaf	mud		0.07216
4d	leaf	sand		0.10496
4d	leaf	mud		0.09184
10d	leaf	sand	1	0.0984
10d	leaf	sand	2	0.13776
10d	leaf	sand	3	0.11152
10d	leaf	mud	4	0.0984
10d	leaf	mud	5	0.09184
10d	leaf	mud	6	0.11152
20d	leaf	sand	1	0.0984
20d	leaf	sand	2	0.15088
20d	leaf	sand	3	0.10496
20d	leaf	mud	4	0.0984
20d	leaf	mud	5	0.11808
20d	leaf	mud	6	0.09184
30d	leaf	sand	1	0.09184
30d	leaf	sand	2	0.07872
30d	leaf	sand	3	0.07872
30d	leaf	mud	4	0.11152
30d	leaf	mud	5	0.11152
30d	leaf	mud	6	0.0984
40d	leaf	sand	1	0.10496
40d	leaf	sand	2	0.07216
40d	leaf	sand	3	0.0984
40d	leaf	mud	4	0.07872
40d	leaf	mud	5	0.09184
40d	leaf	mud	6	0.0984
50d	leaf	sand	1	0.0984
50d	leaf	sand	2	0.14432
50d	leaf	sand	3	0.09184
50d	leaf	mud	4	0.09184
50d	leaf	mud	5	0.10496
50d	leaf	mud	6	0.07872
0d	root	mud		0.04592
4d	root	sand		0.0656
4d	root	mud		0.0656
10d	root	sand	1	0.07216
10d	root	sand	2	0.07216
10d	root	sand	3	0.0656
10d	root	mud	4	0.07216
10d	root	mud	5	0.07872
10d	root	mud	6	0.03936
20d	root	sand	1	0.0656
20d	root	sand	2	0.0656
20d	root	sand	3	0.04592
20d	root	mud	4	0.07216
20d	root	mud	5	0.10496
20d	root	mud	6	0.0656
30d	root	sand	1	0.05904
30d	root	sand	2	0.05248
30d	root	sand	3	0.05904
30d	root	mud	4	0.07216
30d	root	mud	5	0.07216
30d	root	mud	6	0.0656
40d	root	sand	1	0.0656
40d	root	sand	2	0.03936
40d	root	sand	3	0.05904
40d	root	mud	4	0.03936
40d	root	mud	5	0.05248
40d	root	mud	6	0.04592
50d	root	sand	1	0.03936
50d	root	sand	2	0.03936
50d	root	sand	3	0.04592
50d	root	mud	4	0.04592
50d	root	mud	5	0.03936
50d	root	mud	6	0.04592

## Sheet: POD
day	tissue	substrate	beaker id	pod
0d	leaf	mud		12.8649
4d	leaf	sand		15.8175
4d	leaf	mud		9.2796
10d	leaf	sand	1	23.199
10d	leaf	sand	2	18.0671
10d	leaf	sand	3	24.8159
10d	leaf	mud	4	17.3641
10d	leaf	mud	5	16.6611
10d	leaf	mud	6	23.5505
20d	leaf	sand	1	18.8404
20d	leaf	sand	2	20.5276
20d	leaf	sand	3	14.763
20d	leaf	mud	4	16.6611
20d	leaf	mud	5	22.0742
20d	leaf	mud	6	23.6911
30d	leaf	sand	1	18.6998
30d	leaf	sand	2	17.9968
30d	leaf	sand	3	12.2322
30d	leaf	mud	4	24.4644
30d	leaf	mud	5	22.4257
30d	leaf	mud	6	24.9565
40d	leaf	sand	1	14.1303
40d	leaf	sand	2	18.2077
40d	leaf	sand	3	14.2709
40d	leaf	mud	4	8.5766
40d	leaf	mud	5	6.8894
40d	leaf	mud	6	11.1074
50d	leaf	sand	1	8.9281
50d	leaf	sand	2	5.1319
50d	leaf	sand	3	3.4447
50d	leaf	mud	4	11.3183
50d	leaf	mud	5	7.3112
50d	leaf	mud	6	9.2093
0d	root	mud		10.545
4d	root	sand		49.2803
4d	root	mud		24.8862
10d	root	sand	1	28.4715
10d	root	sand	2	24.0426
10d	root	sand	3	31.0726
10d	root	mud	4	22.6366
10d	root	mud	5	19.684
10d	root	mud	6	26.6437
20d	root	sand	1	30.8617
20d	root	sand	2	31.1429
20d	root	sand	3	22.7772
20d	root	mud	4	26.6437
20d	root	mud	5	17.4344
20d	root	mud	6	27.4873
30d	root	sand	1	29.1745
30d	root	sand	2	20.6682
30d	root	sand	3	27.7685
30d	root	mud	4	19.7543
30d	root	mud	5	19.0513
30d	root	mud	6	17.575
40d	root	sand	1	22.4257
40d	root	sand	2	18.278
40d	root	sand	3	17.7156
40d	root	mud	4	16.0987
40d	root	mud	5	15.6066
40d	root	mud	6	15.8878
50d	root	sand	1	23.1287
50d	root	sand	2	23.4802
50d	root	sand	3	24.605
50d	root	mud	4	23.199
50d	root	mud	5	23.6208
50d	root	mud	6	22.9178
