# Supplementary material for: Effects of substrate and water depth of a eutrophic pond on the physiological status of a submerged plant, Vallisneria natans
Source: PeerJ. 2020 Nov 9;8:e10273. doi: 10.7717/peerj.10273 (PMC7659635; doi:10.7717/peerj.10273)
Supplement: Supplemental Information 5 [file peerj-08-10273-s005.xlsx]

## Sheet: Sheet1
day	depth	temp	pH	DO	ORP	EC	Chl.a	Turbidity		day	transparency		day	depth	light		day	depth	cod	tn	tp	no3	no2	nh4
0d	0.5m	21.76	8.25	10.02	236	446	59.17	43.6		0d	0.25		0d	0.5m	84.7		0d	0.5m	42	8.91209	0.435429	5.53996	0.385935	0.225556
0d	0.5m	21.75	8.25	10.02	235.3	446	59.25	43.9		5d	0.27		1d	0.5m	162.85		5d	0.5m	40	9.05495	0.424	6.1879	0.41221	0.964444
0d	0.5m	21.74	8.25	10	235	446	64.36	44.4		10d	0.27		2d	0.5m	62.85		10d	0.5m	75	8.2967	0.469714	4.67603	0.512674	0.00888889
0d	0.5m	21.74	8.25	9.98	235	446	65.53	46.3		20d	0.28		3d	0.5m	96.2667		20d	0.5m	24	6.46154	0.458286	4.87041	0.568315	0.08
0d	0.5m	21.74	8.25	9.99	234	446	66.43	46.1		30d	0.3		4d	0.5m	82.2833		30d	0.5m	25	7.26374	0.462095	5.51836	0.718238	0.67
0d	1.2m	21.74	8.24	9.92	233	446	68.21	48.8					5d	0.5m	105.667		0d	1.2m	37	8.14286	0.393524	4.80562	0.438485	0.431111
0d	1.2m	21.74	8.24	9.95	233	446	66.97	48.2					6d	0.5m	97.9667		5d	1.2m	33	8.3956	0.412571	5.82073	0.418393	0.942222
0d	1.2m	21.73	8.23	9.95	233	445.7	65.74	48.2					7d	0.5m	96.1833		10d	1.2m	77	7.97802	0.515429	5.0432	0.525039	0.108889
0d	1.2m	21.74	8.24	9.95	232	446	64.3	48.2					8d	0.5m	90.0333		20d	1.2m	25	6.04396	0.443048	4.67603	0.543586	0.0855556
0d	1.2m	21.74	8.24	9.94	232	446	63.9	48.7					9d	0.5m	91.5833		30d	1.2m	29	6.61538	0.382095	5.23758	0.705873	0.625556
0d	2m	21.73	8.25	9.93	230	446	70.4	48.9					10d	0.5m	96.4833		0d	2m	34	8.45055	0.363048	5.84233	0.430757	0.42
0d	2m	21.73	8.25	9.93	230	446	69.81	48.7					11d	0.5m	45.1		5d	2m	32	8	0.412571	5.79914	0.418393	0.958889
0d	2m	21.73	8.24	9.96	230	446	70.48	48.6					12d	0.5m	87.7667		10d	2m	75	8.42857	0.641143	4.89201	0.521947	0.0755556
0d	2m	21.73	8.24	9.96	230	446	70.6	48.5					13d	0.5m	94.5		20d	2m	31	5.63736	0.42781	4.84881	0.520402	0.0911111
0d	2m	21.73	8.24	9.95	230	446	70.59	48.2					14d	0.5m	65.9		30d	2m	30	6.98901	0.424	5.21598	0.718238	0.536667
5d	0.5m	23.65	7.9	8.3	279	463	61.3	42.6					15d	0.5m	60.4
5d	0.5m	23.65	7.91	8.3	278	463	60.41	42.5					16d	0.5m	68.9667
5d	0.5m	23.65	7.91	8.29	278	463	58.66	42.2					17d	0.5m	45.6333
5d	0.5m	23.64	7.91	8.29	278	463	57.66	42.2					18d	0.5m	70.0167
5d	0.5m	23.65	7.9	8.28	278	463	55.66	42.1					19d	0.5m	92.4
5d	1.2m	23.65	7.9	8.27	278	463	50.83	43.3					20d	0.5m	56.5167
5d	1.2m	23.65	7.9	8.27	278	463	53.59	43.7					21d	0.5m	50.7
5d	1.2m	23.65	7.9	8.25	278	463	52.11	43.3					22d	0.5m	62.5167
5d	1.2m	23.64	7.9	8.24	278	463	57.23	43.4					23d	0.5m	69.6833
5d	1.2m	23.59	7.91	8.25	277	463	58.73	43.5					24d	0.5m	90.4333
5d	2m	23.58	7.9	8.22	275.3	463	52.18	44.2					25d	0.5m	63.0667
5d	2m	23.58	7.9	8.22	274.9	463	51.81	44.4					26d	0.5m	74.3167
5d	2m	23.57	7.9	8.21	274.5	463	51.44	44.5					27d	0.5m	66.8
5d	2m	23.58	7.9	8.2	274.1	463	51.08	44.6					28d	0.5m	62.95
5d	2m	23.58	7.91	8.23	274	463	51.3	45.4					29d	0.5m	76.85
10d	0.5m	24.96	8.42	9.28	119.7	440	33.66	62					30d	0.5m	88.3167
10d	0.5m	24.97	8.39	9.2	121	440	34.52	58.2					0d	1.2m	28.6833
10d	0.5m	24.97	8.36	9.15	121.7	440	34.95	57.7					1d	1.2m	57.9333
10d	0.5m	24.96	8.33	9.13	122.7	440	36.06	56.1					2d	1.2m	34.6667
10d	0.5m	24.98	8.21	9.14	125.3	442	37.08	59					3d	1.2m	39.3
10d	1.2m	24.98	8.05	8.56	127	443.7	39.06	56.9					4d	1.2m	39.7333
10d	1.2m	24.98	8.04	8.46	127.3	444	39.36	57.1					5d	1.2m	53.5333
10d	1.2m	24.98	8.01	8.47	128	444	43.88	62.2					6d	1.2m	47.5167
10d	1.2m	24.99	7.99	8.39	129	444	50.17	64.2					7d	1.2m	40.4667
10d	1.2m	24.98	7.97	8.36	129.7	444	49.82	64					8d	1.2m	33.0833
10d	2m	24.98	7.93	8.13	132	445	49.77	66.9					9d	1.2m	33.9833
10d	2m	24.98	7.91	8.13	134.1	446.2	49.77	66					10d	1.2m	42.3667
10d	2m	24.98	7.94	8.13	134.9	446.6	49.77	66.9					11d	1.2m	29.85
10d	2m	24.98	7.94	8.13	135.6	446.9	49.77	66.8					12d	1.2m	39.9667
10d	2m	24.98	7.93	8.13	132	445	49.77	66.7					13d	1.2m	43.7
20d	0.5m	23.67	8.02	7.52	41.3	450	63.2	76.8					14d	1.2m	30.5
20d	0.5m	23.68	8.02	7.52	45.7	450	61.17	75					15d	1.2m	31.85
20d	0.5m	23.68	8.02	7.52	49.7	450	59.55	77					16d	1.2m	34.4333
20d	0.5m	23.68	8.02	7.53	52.3	449.7	59.8	75.8					17d	1.2m	31.3
20d	0.5m	23.68	8.03	7.54	55.7	449.7	59.56	74.5					18d	1.2m	35.45
20d	1.2m	23.68	8.03	7.54	65.7	449.3	65.46	74.2					19d	1.2m	40.7333
20d	1.2m	23.68	8.03	7.54	67.7	450	65.05	73.1					20d	1.2m	28.2
20d	1.2m	23.68	8.04	7.54	69	450	64.08	73.7					21d	1.2m	31.3833
20d	1.2m	23.68	8.04	7.54	70.3	449.3	64.39	75.1					22d	1.2m	32.9
20d	1.2m	23.68	8.04	7.53	71.7	449.3	63.89	76.1					23d	1.2m	33.4333
20d	2m	23.67	8.05	7.54	84.7	449.7	61.08	74.4					24d	1.2m	47
20d	2m	23.67	8.05	7.54	85.3	449.7	61.1	71.3					25d	1.2m	46.4
20d	2m	23.67	8.05	7.54	85.3	449.7	61.1	73.8					26d	1.2m	41.6333
20d	2m	23.67	8.05	7.55	89.1	449.7	60.45	77.8					27d	1.2m	33.5667
20d	2m	23.67	8.06	7.55	91.1	449.8	59.98	72					28d	1.2m	35.05
30d	0.5m	23.9	8.08	6.42	237	430	27.8	34.1					29d	1.2m	44.6833
30d	0.5m	23.9	8.09	6.44	237	430	28.25	35.2					30d	1.2m	42.8833
30d	0.5m	23.9	8.08	6.43	238	430	28.23	35.1					0d	2m	6.4
30d	0.5m	23.9	8.08	6.43	238	430	28.05	34.9					1d	2m	7.91667
30d	0.5m	23.87	8.08	6.43	238	430	28.08	34.8					2d	2m	7.78333
30d	1.2m	23.86	8.08	6.39	239	430	27.91	35.6					3d	2m	7.3
30d	1.2m	23.84	8.09	6.38	239	430	28.93	35.7					4d	2m	7.75
30d	1.2m	23.84	8.09	6.37	239	430	27.92	35.9					5d	2m	8.36667
30d	1.2m	23.83	8.09	6.36	240	430	28.08	36.2					6d	2m	7.08333
30d	1.2m	23.82	8.09	6.38	240	430	28.1	36.4					7d	2m	6.8
30d	2m	23.81	8.1	6.39	241	430	31.37	37.4					8d	2m	6.56667
30d	2m	23.81	8.1	6.37	241	430	30.27	38					9d	2m	6.51667
30d	2m	23.81	8.1	6.37	241	430	29.75	38					10d	2m	6.51667
30d	2m	23.81	8.1	6.37	241	430	29.22	38					11d	2m	6.68333
30d	2m	23.81	8.1	6.37	241	430	28.7	38.1					12d	2m	7.05
													13d	2m	6.53333
													14d	2m	6.25
													15d	2m	6.4
													16d	2m	6.28333
													17d	2m	6.18333
													18d	2m	6.68333
													19d	2m	6.66667
													20d	2m	5.83333
													21d	2m	6.73333
													22d	2m	7
													23d	2m	6.63333
													24d	2m	7.7
													25d	2m	6.73333
													26d	2m	5.56667
													27d	2m	5.43333
													28d	2m	5.63333
													29d	2m	5.81667
													30d	2m	5.96667
