# Supplementary material for: Effects of substrate and water depth of a eutrophic pond on the physiological status of a submerged plant, Vallisneria natans
Source: PeerJ. 2020 Nov 9;8:e10273. doi: 10.7717/peerj.10273 (PMC7659635; doi:10.7717/peerj.10273)
Supplement: Supplemental Information 6 [file peerj-08-10273-s006.xlsx]

## Sheet: Chl
day	depth	substrate	tray id	chla	chlb
0d				0.366	0.146
0d				0.362	0.114
0d				0.356	0.136
5d	2m	sand	1	0.161	0.069
5d	2m	sand	2	0.151	0.06
5d	2m	sand	3	0.122	0.058
5d	1.2m	sand	4	0.177	0.049
5d	1.2m	sand	5	0.219	0.066
5d	1.2m	sand	6	0.232	0.064
5d	0.5m	sand	7	0.195	0.049
5d	0.5m	sand	8	0.233	0.089
5d	0.5m	sand	9	0.242	0.093
5d	2m	mud	10	0.201	0.096
5d	2m	mud	11	0.189	0.098
5d	2m	mud	12	0.182	0.088
5d	1.2m	mud	13	0.166	0.079
5d	1.2m	mud	14	0.182	0.074
5d	1.2m	mud	15	0.155	0.081
5d	0.5m	mud	16	0.3	0.136
5d	0.5m	mud	17	0.287	0.145
5d	0.5m	mud	18	0.247	0.15
10d	2m	sand	1	0.128	0.058
10d	2m	sand	2	0.136	0.088
10d	2m	sand	3	0.127	0.055
10d	1.2m	sand	4	0.202	0.093
10d	1.2m	sand	5	0.202	0.084
10d	1.2m	sand	6	0.182	0.08
10d	0.5m	sand	7	0.337	0.225
10d	0.5m	sand	8	0.243	0.128
10d	0.5m	sand	9	0.243	0.105
10d	2m	mud	10	0.088	0.038
10d	2m	mud	11	0.104	0.047
10d	2m	mud	12	0.103	0.061
10d	1.2m	mud	13	0.243	0.08
10d	1.2m	mud	14	0.211	0.07
10d	1.2m	mud	15	0.213	0.071
10d	0.5m	mud	16	0.233	0.106
10d	0.5m	mud	17	0.245	0.108
10d	0.5m	mud	18	0.26	0.112
20d	2m	sand	1	0.054	0.025
20d	2m	sand	2	0.077	0.034
20d	2m	sand	3	0.051	0.02
20d	1.2m	sand	4	0.2	0.121
20d	1.2m	sand	5	0.153	0.064
20d	1.2m	sand	6	0.164	0.076
20d	0.5m	sand	7	0.32	0.149
20d	0.5m	sand	8	0.277	0.128
20d	0.5m	sand	9	0.35	0.183
20d	2m	mud	10	0.132	0.056
20d	2m	mud	11	0.053	0.021
20d	2m	mud	12	0.073	0.031
20d	1.2m	mud	13	0.162	0.07
20d	1.2m	mud	14	0.215	0.103
20d	1.2m	mud	15	0.17	0.081
20d	0.5m	mud	16	0.304	0.142
20d	0.5m	mud	17	0.251	0.113
20d	0.5m	mud	18	0.278	0.133
30d	2m	sand	1	0.059	0.021
30d	2m	sand	2	0.07	0.022
30d	2m	sand	3	0.059	0.035
30d	1.2m	sand	4	0.151	0.068
30d	1.2m	sand	5	0.182	0.085
30d	1.2m	sand	6	0.154	0.072
30d	0.5m	sand	7	0.353	0.161
30d	0.5m	sand	8	0.287	0.133
30d	0.5m	sand	9	0.238	0.108
30d	2m	mud	10	0.017	0.006
30d	2m	mud	11	0.013	0.004
30d	2m	mud	12	0.025	0.002
30d	1.2m	mud	13	0.124	0.058
30d	1.2m	mud	14	0.115	0.053
30d	1.2m	mud	15	0.152	0.072
30d	0.5m	mud	16	0.256377	0.0742739
30d	0.5m	mud	17	0.262371	0.0555971
30d	0.5m	mud	18	0.258121	0.108961

## Sheet: MDA
tissue	day	depth	substrate	tray id	mda
leaf	0d				3.06931
leaf	0d				3.04783
leaf	0d				2.65339
leaf	5d	2m	sand	1	3.66557
leaf	5d	2m	sand	2	5.16006
leaf	5d	2m	sand	3	4.75381
leaf	5d	1.2m	sand	4	3.0385
leaf	5d	1.2m	sand	5	3.61164
leaf	5d	1.2m	sand	6	3.35447
leaf	5d	0.5m	sand	7	2.97253
leaf	5d	0.5m	sand	8	3.54438
leaf	5d	0.5m	sand	9	3.22312
leaf	5d	2m	mud	10	6.23981
leaf	5d	2m	mud	11	6.34399
leaf	5d	2m	mud	12	5.92018
leaf	5d	1.2m	mud	13	4.94364
leaf	5d	1.2m	mud	14	5.01798
leaf	5d	1.2m	mud	15	5.29275
leaf	5d	0.5m	mud	16	5.27292
leaf	5d	0.5m	mud	17	5.03124
leaf	5d	0.5m	mud	18	4.8653
leaf	10d	2m	sand	1	7.07467
leaf	10d	2m	sand	2	7.10737
leaf	10d	2m	sand	3	7.37893
leaf	10d	1.2m	sand	4	5.87763
leaf	10d	1.2m	sand	5	6.42341
leaf	10d	1.2m	sand	6	6.82363
leaf	10d	0.5m	sand	7	5.78337
leaf	10d	0.5m	sand	8	6.0708
leaf	10d	0.5m	sand	9	6.57567
leaf	10d	2m	mud	10	6.86881
leaf	10d	2m	mud	11	7.19748
leaf	10d	2m	mud	12	6.66039
leaf	10d	1.2m	mud	13	5.52072
leaf	10d	1.2m	mud	14	5.57386
leaf	10d	1.2m	mud	15	5.65143
leaf	10d	0.5m	mud	16	5.18526
leaf	10d	0.5m	mud	17	5.91964
leaf	10d	0.5m	mud	18	4.90924
leaf	20d	2m	sand	1	8.18802
leaf	20d	2m	sand	2	8.57462
leaf	20d	2m	sand	3	8.81744
leaf	20d	1.2m	sand	4	6.46998
leaf	20d	1.2m	sand	5	7.94234
leaf	20d	1.2m	sand	6	7.43778
leaf	20d	0.5m	sand	7	7.57148
leaf	20d	0.5m	sand	8	7.20272
leaf	20d	0.5m	sand	9	8.01138
leaf	20d	2m	mud	10	7.49455
leaf	20d	2m	mud	11	6.49145
leaf	20d	2m	mud	12	8.07092
leaf	20d	1.2m	mud	13	6.78969
leaf	20d	1.2m	mud	14	5.78703
leaf	20d	1.2m	mud	15	8.45132
leaf	20d	0.5m	mud	16	6.90937
leaf	20d	0.5m	mud	17	7.27187
leaf	20d	0.5m	mud	18	6.92407
leaf	30d	2m	sand	1	9.05498
leaf	30d	2m	sand	2	8.59022
leaf	30d	2m	sand	3	9.14563
leaf	30d	1.2m	sand	4	6.86295
leaf	30d	1.2m	sand	5	9.24129
leaf	30d	1.2m	sand	6	7.83043
leaf	30d	0.5m	sand	7	7.70013
leaf	30d	0.5m	sand	8	7.81408
leaf	30d	0.5m	sand	9	7.88577
leaf	30d	2m	mud	10	8.68406
leaf	30d	2m	mud	11	10.0171
leaf	30d	2m	mud	12	10.1348
leaf	30d	1.2m	mud	13	8.56163
leaf	30d	1.2m	mud	14	7.98832
leaf	30d	1.2m	mud	15	8.6101
leaf	30d	0.5m	mud	16	7.57914
leaf	30d	0.5m	mud	17	7.35179
leaf	30d	0.5m	mud	18	6.80712
root	0d				4.2494
root	0d				3.19984
root	0d				3.6739
root	5d	2m	sand	1	4.09103
root	5d	2m	sand	2	4.89532
root	5d	2m	sand	3	4.76689
root	5d	1.2m	sand	4	5.06443
root	5d	1.2m	sand	5	4.57809
root	5d	1.2m	sand	6	4.83834
root	5d	0.5m	sand	7	4.69658
root	5d	0.5m	sand	8	4.41817
root	5d	0.5m	sand	9	4.40648
root	5d	2m	mud	10	4
root	5d	2m	mud	11	4.18647
root	5d	2m	mud	12	3.96112
root	5d	1.2m	mud	13	3.22376
root	5d	1.2m	mud	14	4.33652
root	5d	1.2m	mud	15	3.59261
root	5d	0.5m	mud	16	2.75052
root	5d	0.5m	mud	17	4.13067
root	5d	0.5m	mud	18	3.34825
root	10d	2m	sand	1	5.63766
root	10d	2m	sand	2	5.39374
root	10d	2m	sand	3	5.31566
root	10d	1.2m	sand	4	4.22179
root	10d	1.2m	sand	5	5.27716
root	10d	1.2m	sand	6	4.84076
root	10d	0.5m	sand	7	3.21884
root	10d	0.5m	sand	8	3.85269
root	10d	0.5m	sand	9	4.49227
root	10d	2m	mud	10	3.10971
root	10d	2m	mud	11	3.84325
root	10d	2m	mud	12	4.21839
root	10d	1.2m	mud	13	3.32895
root	10d	1.2m	mud	14	3.9526
root	10d	1.2m	mud	15	3.57264
root	10d	0.5m	mud	16	3.55934
root	10d	0.5m	mud	17	3.36126
root	10d	0.5m	mud	18	3.03626
root	20d	2m	sand	1	6.33327
root	20d	2m	sand	2	6.03165
root	20d	2m	sand	3	4.94818
root	20d	1.2m	sand	4	4.40202
root	20d	1.2m	sand	5	3.77334
root	20d	1.2m	sand	6	4.86227
root	20d	0.5m	sand	7	3.77562
root	20d	0.5m	sand	8	3.61075
root	20d	0.5m	sand	9	4.30994
root	20d	2m	mud	10	4.49016
root	20d	2m	mud	11	4.15231
root	20d	2m	mud	12	5.79202
root	20d	1.2m	mud	13	4.4632
root	20d	1.2m	mud	14	4.12629
root	20d	1.2m	mud	15	3.69081
root	20d	0.5m	mud	16	4.81782
root	20d	0.5m	mud	17	3.41423
root	20d	0.5m	mud	18	4.0886
root	30d	2m	sand	1	7.00457
root	30d	2m	sand	2	7.61792
root	30d	2m	sand	3	5.76901
root	30d	1.2m	sand	4	5.14665
root	30d	1.2m	sand	5	5.37178
root	30d	1.2m	sand	6	5.0624
root	30d	0.5m	sand	7	4.85362
root	30d	0.5m	sand	8	4.33759
root	30d	0.5m	sand	9	4.85106
root	30d	2m	mud	10	8.59127
root	30d	2m	mud	11	4.80554
root	30d	2m	mud	12	4.25695
root	30d	1.2m	mud	13	5.10558
root	30d	1.2m	mud	14	3.89891
root	30d	1.2m	mud	15	3.88365
root	30d	0.5m	mud	16	4.33274
root	30d	0.5m	mud	17	3.56061
root	30d	0.5m	mud	18	3.83397

## Sheet: SOD
tissue	day	depth	substrate	tray id	sod
leaf	0d				71.3649
leaf	0d				75.7878
leaf	0d				59.6837
leaf	5d	2m	sand	1	154.389
leaf	5d	2m	sand	2	163.444
leaf	5d	2m	sand	3	171.195
leaf	5d	1.2m	sand	4	130.499
leaf	5d	1.2m	sand	5	129.302
leaf	5d	1.2m	sand	6	140.875
leaf	5d	0.5m	sand	7	137.058
leaf	5d	0.5m	sand	8	139.398
leaf	5d	0.5m	sand	9	123.647
leaf	5d	2m	mud	10	153.647
leaf	5d	2m	mud	11	151.259
leaf	5d	2m	mud	12	135.993
leaf	5d	1.2m	mud	13	106.147
leaf	5d	1.2m	mud	14	91.9586
leaf	5d	1.2m	mud	15	135.424
leaf	5d	0.5m	mud	16	78.2053
leaf	5d	0.5m	mud	17	113.461
leaf	5d	0.5m	mud	18	132.509
leaf	10d	2m	sand	1	185.369
leaf	10d	2m	sand	2	200.192
leaf	10d	2m	sand	3	173.074
leaf	10d	1.2m	sand	4	153.509
leaf	10d	1.2m	sand	5	132.521
leaf	10d	1.2m	sand	6	167.049
leaf	10d	0.5m	sand	7	130.031
leaf	10d	0.5m	sand	8	139.737
leaf	10d	0.5m	sand	9	158.556
leaf	10d	2m	mud	10	207.139
leaf	10d	2m	mud	11	212.249
leaf	10d	2m	mud	12	222.455
leaf	10d	1.2m	mud	13	161.722
leaf	10d	1.2m	mud	14	167.971
leaf	10d	1.2m	mud	15	198.617
leaf	10d	0.5m	mud	16	151.097
leaf	10d	0.5m	mud	17	135.219
leaf	10d	0.5m	mud	18	167.566
leaf	20d	2m	sand	1	117.742
leaf	20d	2m	sand	2	127.642
leaf	20d	2m	sand	3	107.944
leaf	20d	1.2m	sand	4	251.398
leaf	20d	1.2m	sand	5	254.851
leaf	20d	1.2m	sand	6	261.164
leaf	20d	0.5m	sand	7	210.722
leaf	20d	0.5m	sand	8	202.533
leaf	20d	0.5m	sand	9	204.771
leaf	20d	2m	mud	10	120.914
leaf	20d	2m	mud	11	127.409
leaf	20d	2m	mud	12	130.84
leaf	20d	1.2m	mud	13	244.673
leaf	20d	1.2m	mud	14	213.843
leaf	20d	1.2m	mud	15	249.88
leaf	20d	0.5m	mud	16	222.861
leaf	20d	0.5m	mud	17	249.072
leaf	20d	0.5m	mud	18	262.944
leaf	30d	2m	sand	1	80.4976
leaf	30d	2m	sand	2	82.5941
leaf	30d	2m	sand	3	101.918
leaf	30d	1.2m	sand	4	224.529
leaf	30d	1.2m	sand	5	249.693
leaf	30d	1.2m	sand	6	300.387
leaf	30d	0.5m	sand	7	217.776
leaf	30d	0.5m	sand	8	216.461
leaf	30d	0.5m	sand	9	217.611
leaf	30d	2m	mud	10	95.6795
leaf	30d	2m	mud	11	100.859
leaf	30d	2m	mud	12	106.12
leaf	30d	1.2m	mud	13	200.939
leaf	30d	1.2m	mud	14	301.374
leaf	30d	1.2m	mud	15	273.262
leaf	30d	0.5m	mud	16	221.957
leaf	30d	0.5m	mud	17	276.26
leaf	30d	0.5m	mud	18	323.554
root	0d				84.1241
root	0d				62.0339
root	0d				73.6465
root	5d	2m	sand	1	117.093
root	5d	2m	sand	2	135.98
root	5d	2m	sand	3	104.747
root	5d	1.2m	sand	4	105.757
root	5d	1.2m	sand	5	80.973
root	5d	1.2m	sand	6	98.1709
root	5d	0.5m	sand	7	81.0133
root	5d	0.5m	sand	8	68.5211
root	5d	0.5m	sand	9	78.3923
root	5d	2m	mud	10	110.503
root	5d	2m	mud	11	92.6389
root	5d	2m	mud	12	133.863
root	5d	1.2m	mud	13	94.2051
root	5d	1.2m	mud	14	110.891
root	5d	1.2m	mud	15	93.3007
root	5d	0.5m	mud	16	95.7463
root	5d	0.5m	mud	17	114.318
root	5d	0.5m	mud	18	89.2307
root	10d	2m	sand	1	244.624
root	10d	2m	sand	2	222.51
root	10d	2m	sand	3	245.293
root	10d	1.2m	sand	4	134.814
root	10d	1.2m	sand	5	129.766
root	10d	1.2m	sand	6	140.253
root	10d	0.5m	sand	7	138.138
root	10d	0.5m	sand	8	125.046
root	10d	0.5m	sand	9	134.411
root	10d	2m	mud	10	210.293
root	10d	2m	mud	11	198.319
root	10d	2m	mud	12	195.025
root	10d	1.2m	mud	13	171.646
root	10d	1.2m	mud	14	160.778
root	10d	1.2m	mud	15	158.31
root	10d	0.5m	mud	16	166.933
root	10d	0.5m	mud	17	181.252
root	10d	0.5m	mud	18	166.533
root	20d	2m	sand	1	115.879
root	20d	2m	sand	2	110.127
root	20d	2m	sand	3	135.884
root	20d	1.2m	sand	4	175.798
root	20d	1.2m	sand	5	148.716
root	20d	1.2m	sand	6	168.104
root	20d	0.5m	sand	7	145.268
root	20d	0.5m	sand	8	155.906
root	20d	0.5m	sand	9	151.756
root	20d	2m	mud	10	134.606
root	20d	2m	mud	11	127.994
root	20d	2m	mud	12	148.459
root	20d	1.2m	mud	13	207.713
root	20d	1.2m	mud	14	194.055
root	20d	1.2m	mud	15	198.809
root	20d	0.5m	mud	16	211.312
root	20d	0.5m	mud	17	195.775
root	20d	0.5m	mud	18	182.131
root	30d	2m	sand	1	94.9677
root	30d	2m	sand	2	86.6832
root	30d	2m	sand	3	104.328
root	30d	1.2m	sand	4	180.692
root	30d	1.2m	sand	5	188.923
root	30d	1.2m	sand	6	165.333
root	30d	0.5m	sand	7	159.816
root	30d	0.5m	sand	8	151.75
root	30d	0.5m	sand	9	154.63
root	30d	2m	mud	10	110.606
root	30d	2m	mud	11	110.483
root	30d	2m	mud	12	130.9
root	30d	1.2m	mud	13	233.406
root	30d	1.2m	mud	14	201.809
root	30d	1.2m	mud	15	224.341
root	30d	0.5m	mud	16	212.547
root	30d	0.5m	mud	17	201.588
root	30d	0.5m	mud	18	196.195

## Sheet: CAT
tissue	day	depth	substrate	tray id	cat
leaf	0d				0.0845277
leaf	0d				0.0915836
leaf	0d				0.0978812
leaf	5d	2m	sand	1	0.144061
leaf	5d	2m	sand	2	0.150369
leaf	5d	2m	sand	3	0.143645
leaf	5d	1.2m	sand	4	0.129708
leaf	5d	1.2m	sand	5	0.118502
leaf	5d	1.2m	sand	6	0.124236
leaf	5d	0.5m	sand	7	0.122605
leaf	5d	0.5m	sand	8	0.115374
leaf	5d	0.5m	sand	9	0.113861
leaf	5d	2m	mud	10	0.114537
leaf	5d	2m	mud	11	0.104448
leaf	5d	2m	mud	12	0.111514
leaf	5d	1.2m	mud	13	0.0979202
leaf	5d	1.2m	mud	14	0.0917987
leaf	5d	1.2m	mud	15	0.104516
leaf	5d	0.5m	mud	16	0.101084
leaf	5d	0.5m	mud	17	0.093576
leaf	5d	0.5m	mud	18	0.103792
leaf	10d	2m	sand	1	0.169374
leaf	10d	2m	sand	2	0.169593
leaf	10d	2m	sand	3	0.176855
leaf	10d	1.2m	sand	4	0.145975
leaf	10d	1.2m	sand	5	0.157267
leaf	10d	1.2m	sand	6	0.150624
leaf	10d	0.5m	sand	7	0.134348
leaf	10d	0.5m	sand	8	0.130333
leaf	10d	0.5m	sand	9	0.127831
leaf	10d	2m	mud	10	0.135026
leaf	10d	2m	mud	11	0.143139
leaf	10d	2m	mud	12	0.137629
leaf	10d	1.2m	mud	13	0.127819
leaf	10d	1.2m	mud	14	0.122671
leaf	10d	1.2m	mud	15	0.131167
leaf	10d	0.5m	mud	16	0.123899
leaf	10d	0.5m	mud	17	0.121541
leaf	10d	0.5m	mud	18	0.123339
leaf	20d	2m	sand	1	0.120951
leaf	20d	2m	sand	2	0.140979
leaf	20d	2m	sand	3	0.108125
leaf	20d	1.2m	sand	4	0.175767
leaf	20d	1.2m	sand	5	0.178668
leaf	20d	1.2m	sand	6	0.170449
leaf	20d	0.5m	sand	7	0.140632
leaf	20d	0.5m	sand	8	0.130684
leaf	20d	0.5m	sand	9	0.130417
leaf	20d	2m	mud	10	0.107588
leaf	20d	2m	mud	11	0.103399
leaf	20d	2m	mud	12	0.10889
leaf	20d	1.2m	mud	13	0.143931
leaf	20d	1.2m	mud	14	0.150301
leaf	20d	1.2m	mud	15	0.143867
leaf	20d	0.5m	mud	16	0.130146
leaf	20d	0.5m	mud	17	0.134339
leaf	20d	0.5m	mud	18	0.123829
leaf	30d	2m	sand	1	0.124379
leaf	30d	2m	sand	2	0.104029
leaf	30d	2m	sand	3	0.108153
leaf	30d	1.2m	sand	4	0.189002
leaf	30d	1.2m	sand	5	0.169897
leaf	30d	1.2m	sand	6	0.183103
leaf	30d	0.5m	sand	7	0.169349
leaf	30d	0.5m	sand	8	0.170398
leaf	30d	0.5m	sand	9	0.15668
leaf	30d	2m	mud	10	0.0849953
leaf	30d	2m	mud	11	0.110998
leaf	30d	2m	mud	12	0.104422
leaf	30d	1.2m	mud	13	0.15935
leaf	30d	1.2m	mud	14	0.156423
leaf	30d	1.2m	mud	15	0.150474
leaf	30d	0.5m	mud	16	0.136911
leaf	30d	0.5m	mud	17	0.143416
leaf	30d	0.5m	mud	18	0.143531
root	0d				0.0879924
root	0d				0.0844189
root	0d				0.0914013
root	5d	2m	sand	1	0.123681
root	5d	2m	sand	2	0.137739
root	5d	2m	sand	3	0.143516
root	5d	1.2m	sand	4	0.121082
root	5d	1.2m	sand	5	0.111026
root	5d	1.2m	sand	6	0.117487
root	5d	0.5m	sand	7	0.117615
root	5d	0.5m	sand	8	0.111344
root	5d	0.5m	sand	9	0.117668
root	5d	2m	mud	10	0.116501
root	5d	2m	mud	11	0.104929
root	5d	2m	mud	12	0.110855
root	5d	1.2m	mud	13	0.104448
root	5d	1.2m	mud	14	0.0909307
root	5d	1.2m	mud	15	0.104923
root	5d	0.5m	mud	16	0.101411
root	5d	0.5m	mud	17	0.0948308
root	5d	0.5m	mud	18	0.104839
root	10d	2m	sand	1	0.170067
root	10d	2m	sand	2	0.169931
root	10d	2m	sand	3	0.176134
root	10d	1.2m	sand	4	0.149564
root	10d	1.2m	sand	5	0.157157
root	10d	1.2m	sand	6	0.150436
root	10d	0.5m	sand	7	0.136579
root	10d	0.5m	sand	8	0.130899
root	10d	0.5m	sand	9	0.127677
root	10d	2m	mud	10	0.130888
root	10d	2m	mud	11	0.142159
root	10d	2m	mud	12	0.137075
root	10d	1.2m	mud	13	0.128931
root	10d	1.2m	mud	14	0.123192
root	10d	1.2m	mud	15	0.130905
root	10d	0.5m	mud	16	0.127614
root	10d	0.5m	mud	17	0.124584
root	10d	0.5m	mud	18	0.12454
root	20d	2m	sand	1	0.123798
root	20d	2m	sand	2	0.143616
root	20d	2m	sand	3	0.124534
root	20d	1.2m	sand	4	0.176917
root	20d	1.2m	sand	5	0.182921
root	20d	1.2m	sand	6	0.169991
root	20d	0.5m	sand	7	0.140977
root	20d	0.5m	sand	8	0.131121
root	20d	0.5m	sand	9	0.130417
root	20d	2m	mud	10	0.11147
root	20d	2m	mud	11	0.137753
root	20d	2m	mud	12	0.144118
root	20d	1.2m	mud	13	0.143203
root	20d	1.2m	mud	14	0.150406
root	20d	1.2m	mud	15	0.14204
root	20d	0.5m	mud	16	0.131187
root	20d	0.5m	mud	17	0.134326
root	20d	0.5m	mud	18	0.123823
root	30d	2m	sand	1	0.0914878
root	30d	2m	sand	2	0.0716228
root	30d	2m	sand	3	0.0751956
root	30d	1.2m	sand	4	0.189567
root	30d	1.2m	sand	5	0.169593
root	30d	1.2m	sand	6	0.18368
root	30d	0.5m	sand	7	0.170364
root	30d	0.5m	sand	8	0.170279
root	30d	0.5m	sand	9	0.156727
root	30d	2m	mud	10	0.0939364
root	30d	2m	mud	11	0.0911382
root	30d	2m	mud	12	0.091075
root	30d	1.2m	mud	13	0.159857
root	30d	1.2m	mud	14	0.156774
root	30d	1.2m	mud	15	0.150662
root	30d	0.5m	mud	16	0.137252
root	30d	0.5m	mud	17	0.143552
root	30d	0.5m	mud	18	0.143488

## Sheet: POD
tissue	day	depth	substrate	tray id	pod
leaf	0d				14.1937
leaf	0d				13.562
leaf	0d				11.6105
leaf	5d	2m	sand	1	15.2126
leaf	5d	2m	sand	2	16.0574
leaf	5d	2m	sand	3	15.8057
leaf	5d	1.2m	sand	4	13.6826
leaf	5d	1.2m	sand	5	13.3942
leaf	5d	1.2m	sand	6	12.91
leaf	5d	0.5m	sand	7	12.4021
leaf	5d	0.5m	sand	8	13.2493
leaf	5d	0.5m	sand	9	11.4971
leaf	5d	2m	mud	10	15.4844
leaf	5d	2m	mud	11	17.7212
leaf	5d	2m	mud	12	17.2791
leaf	5d	1.2m	mud	13	15.922
leaf	5d	1.2m	mud	14	15.2172
leaf	5d	1.2m	mud	15	15.287
leaf	5d	0.5m	mud	16	13.9497
leaf	5d	0.5m	mud	17	10.6562
leaf	5d	0.5m	mud	18	11.9773
leaf	10d	2m	sand	1	13.0844
leaf	10d	2m	sand	2	13.0218
leaf	10d	2m	sand	3	12.9566
leaf	10d	1.2m	sand	4	15.1548
leaf	10d	1.2m	sand	5	14.56
leaf	10d	1.2m	sand	6	14.4155
leaf	10d	0.5m	sand	7	9.7679
leaf	10d	0.5m	sand	8	14.9168
leaf	10d	0.5m	sand	9	13.3586
leaf	10d	2m	mud	10	15.5491
leaf	10d	2m	mud	11	14.9566
leaf	10d	2m	mud	12	15.0417
leaf	10d	1.2m	mud	13	12.7274
leaf	10d	1.2m	mud	14	14.6607
leaf	10d	1.2m	mud	15	12.9968
leaf	10d	0.5m	mud	16	15.5204
leaf	10d	0.5m	mud	17	14.6192
leaf	10d	0.5m	mud	18	15.3817
leaf	20d	2m	sand	1	7.7477
leaf	20d	2m	sand	2	8.83071
leaf	20d	2m	sand	3	9.57921
leaf	20d	1.2m	sand	4	13.9962
leaf	20d	1.2m	sand	5	12.5052
leaf	20d	1.2m	sand	6	12.5758
leaf	20d	0.5m	sand	7	13.9994
leaf	20d	0.5m	sand	8	11.8173
leaf	20d	0.5m	sand	9	10.5447
leaf	20d	2m	mud	10	7.41691
leaf	20d	2m	mud	11	6.72249
leaf	20d	2m	mud	12	7.10052
leaf	20d	1.2m	mud	13	14.7362
leaf	20d	1.2m	mud	14	12.3604
leaf	20d	1.2m	mud	15	11.0293
leaf	20d	0.5m	mud	16	14.0859
leaf	20d	0.5m	mud	17	12.363
leaf	20d	0.5m	mud	18	13.2969
leaf	30d	2m	sand	1	9.16152
leaf	30d	2m	sand	2	6.32737
leaf	30d	2m	sand	3	5.52358
leaf	30d	1.2m	sand	4	15.0931
leaf	30d	1.2m	sand	5	13.2045
leaf	30d	1.2m	sand	6	13.334
leaf	30d	0.5m	sand	7	16.0056
leaf	30d	0.5m	sand	8	14.9138
leaf	30d	0.5m	sand	9	15.3097
leaf	30d	2m	mud	10	8.5075
leaf	30d	2m	mud	11	8.24127
leaf	30d	2m	mud	12	6.26374
leaf	30d	1.2m	mud	13	15.4432
leaf	30d	1.2m	mud	14	13.3135
leaf	30d	1.2m	mud	15	13.1405
leaf	30d	0.5m	mud	16	13.8422
leaf	30d	0.5m	mud	17	14.1588
leaf	30d	0.5m	mud	18	12.7459
root	0d				8.11565
root	0d				8.49733
root	0d				8.16879
root	5d	2m	sand	1	14.1305
root	5d	2m	sand	2	13.59
root	5d	2m	sand	3	12.2275
root	5d	1.2m	sand	4	12.2438
root	5d	1.2m	sand	5	11.8114
root	5d	1.2m	sand	6	12.9426
root	5d	0.5m	sand	7	12.2875
root	5d	0.5m	sand	8	12.4922
root	5d	0.5m	sand	9	10.8979
root	5d	2m	mud	10	10.1347
root	5d	2m	mud	11	11.2606
root	5d	2m	mud	12	11.4433
root	5d	1.2m	mud	13	10.3174
root	5d	1.2m	mud	14	9.6396
root	5d	1.2m	mud	15	9.02084
root	5d	0.5m	mud	16	10.2688
root	5d	0.5m	mud	17	10.8948
root	5d	0.5m	mud	18	10.2043
root	10d	2m	sand	1	9.86738
root	10d	2m	sand	2	9.45302
root	10d	2m	sand	3	10.1432
root	10d	1.2m	sand	4	9.32593
root	10d	1.2m	sand	5	10.541
root	10d	1.2m	sand	6	9.02139
root	10d	0.5m	sand	7	10.4377
root	10d	0.5m	sand	8	8.75586
root	10d	0.5m	sand	9	11.8495
root	10d	2m	mud	10	9.85843
root	10d	2m	mud	11	9.65327
root	10d	2m	mud	12	10.6109
root	10d	1.2m	mud	13	9.85849
root	10d	1.2m	mud	14	9.86805
root	10d	1.2m	mud	15	9.30706
root	10d	0.5m	mud	16	10.1756
root	10d	0.5m	mud	17	10.4113
root	10d	0.5m	mud	18	9.64029
root	20d	2m	sand	1	7.5884
root	20d	2m	sand	2	7.83362
root	20d	2m	sand	3	7.38572
root	20d	1.2m	sand	4	10.6518
root	20d	1.2m	sand	5	9.21775
root	20d	1.2m	sand	6	9.63971
root	20d	0.5m	sand	7	11.4588
root	20d	0.5m	sand	8	11.2572
root	20d	0.5m	sand	9	10.5606
root	20d	2m	mud	10	9.62767
root	20d	2m	mud	11	8.98355
root	20d	2m	mud	12	9.91412
root	20d	1.2m	mud	13	9.35106
root	20d	1.2m	mud	14	12.2095
root	20d	1.2m	mud	15	9.8814
root	20d	0.5m	mud	16	10.119
root	20d	0.5m	mud	17	9.86066
root	20d	0.5m	mud	18	10.2285
root	30d	2m	sand	1	4.59033
root	30d	2m	sand	2	6.17767
root	30d	2m	sand	3	6.57065
root	30d	1.2m	sand	4	8.78481
root	30d	1.2m	sand	5	10.4922
root	30d	1.2m	sand	6	11.92
root	30d	0.5m	sand	7	12.0821
root	30d	0.5m	sand	8	12.4754
root	30d	0.5m	sand	9	10.321
root	30d	2m	mud	10	8.31918
root	30d	2m	mud	11	9.05825
root	30d	2m	mud	12	8.75843
root	30d	1.2m	mud	13	15.3412
root	30d	1.2m	mud	14	11.1048
root	30d	1.2m	mud	15	13.0371
root	30d	0.5m	mud	16	11.7087
root	30d	0.5m	mud	17	11.6099
root	30d	0.5m	mud	18	9.94233
